# Supplementary material for: A turn-on fluorescent pyrene-based chemosensor for Cu(ii) with live cell application
Source: Royal Society of Chemistry journal article supplement (doi:10.1039/c5ra05440k), 2015-01-01
Supplement: c5ra05440k1.pdf [file c5ra05440k1.pdf]

Supporting information for

**A turn-on fluorescent pyrene-based chemosensor for Cu(II) with live cell application**

Parthiban Venkatesan, Shu-Pao Wu\*

Department of Applied Chemistry, National Chiao Tung University, Hsinchu 300, Taiwan

\*Corresponding author.

Tel.: +886-3-5712121-ext56506; Fax: +886-3-5723764

E-mail: [spwu@mail.nctu.edu.tw](mailto:spwu@mail.nctu.edu.tw)

**Contents**

- 1. Figure S1.**  $^1\text{H}$  NMR (300 MHz,  $\text{DMSO-d}_6$ ) spectrum of PHP
- 2. Figure S2.**  $^{13}\text{C}$  NMR (75 MHz,  $\text{DMSO-d}_6$ ) spectrum of PHP
- 3. Figure S3.** HR Mass (ESI) spectrum of PHP
- 4. Figure S4.** Absorbance changes (a) and Fluorescence response (b) of PHP (10  $\mu\text{M}$ ) to different metal ions (50  $\mu\text{M}$ ) in  $\text{CH}_3\text{CN}/\text{H}_2\text{O}$  ( $v/v = 4:6$ , 10 mM PBS, pH 7.4) solution. The excitation wavelength was 346 nm.
- 5. Figure S5.** Mass spectrum of PHP- $\text{Cu}^{2+}$  complex
- 6. Figure S6.** Calculated mass spectrum of PHP- $\text{Cu}^{2+}$  complex
- 7. Figure S7** Detection limit for titration of  $\text{Cu}^{2+}$  (0.2~1.5 equiv) against ratio of fluorescence response for PHP (10  $\mu\text{M}$ ) in acetonitrile-PBS buffer (0.01M, pH-7.4) ( $v/v = 4:6$ ).
- 8. Figure S8** IR Spectra of PHP and PHP- $\text{Cu}^{2+}$  Complex
- 9. Figure S9.** Reversible cycles of PHP- $\text{Cu}^{2+}$  with EDTA.
- 10. Figure S10.** Fluorescence response of PHP (10  $\mu\text{M}$ ) to  $\text{Cu}^{2+}$  (10 $\mu\text{M}$ ) or 50  $\mu\text{M}$  of other metal ions (the black bar portion) and to the mixture of other metal ions (15 $\mu\text{M}$ ) with  $\text{Cu}^{2+}$  (15  $\mu\text{M}$ ) (the gray bar portion) in acetonitrile-water ( $v/v = 3:7$ ) solutions.

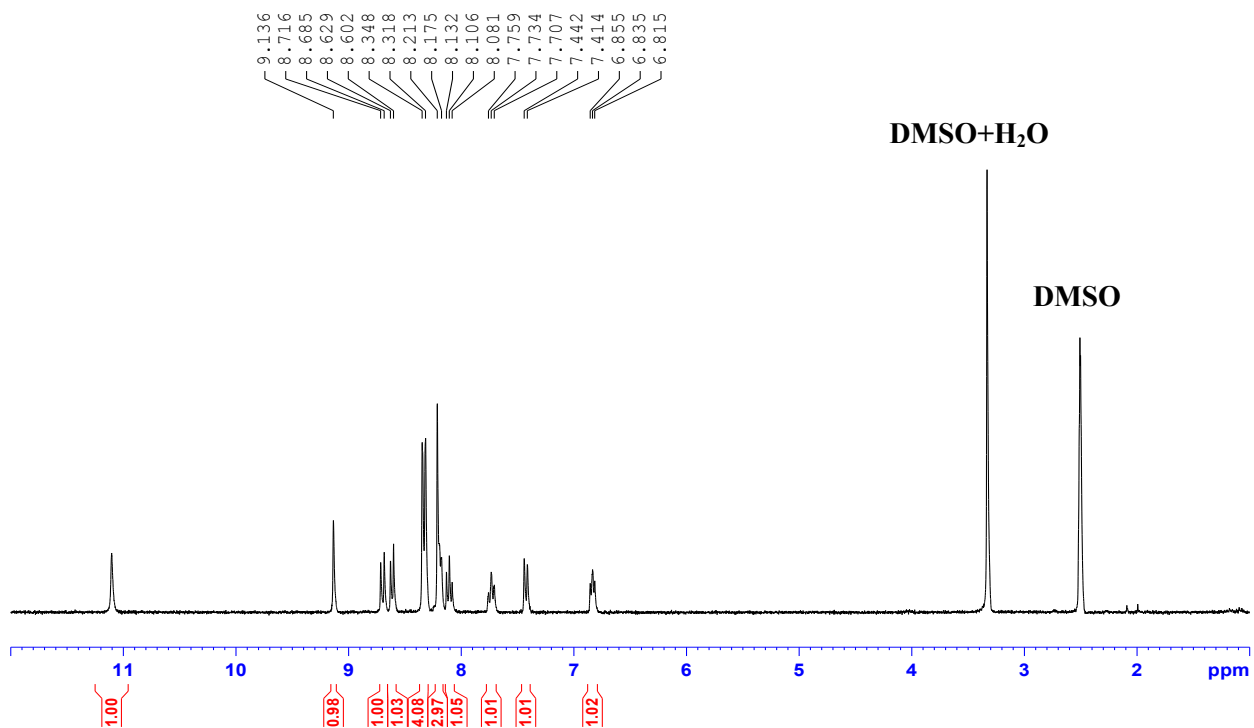

**Figure S1.**  $^1\text{H}$  NMR (300 MHz,  $\text{DMSO-d}_6$ ) spectrum of PHP

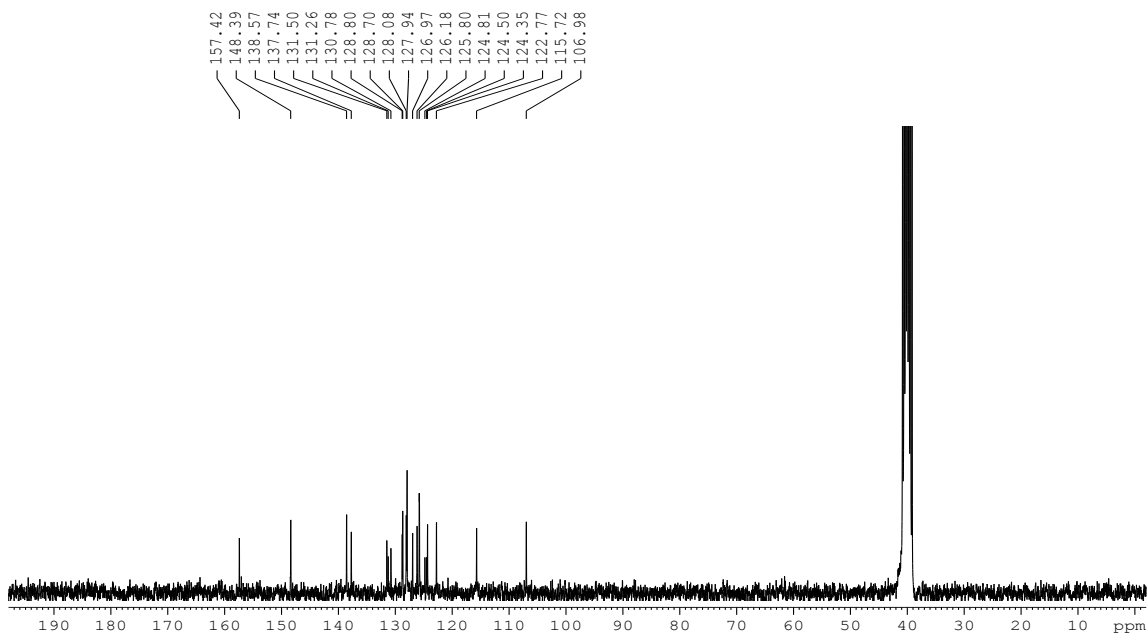

**Figure S2.**  $^{13}\text{C}$  NMR (75 MHz,  $\text{DMSO-d}_6$ ) spectrum of PHP

## Display Report

| Meas. m/z | # | Ion Formula                                    | m/z      | err [ppm] | mSigma | # Sigma | Score  | rdb  | e <sup>-</sup> Conf | N-Rule | Adduct |
|-----------|---|------------------------------------------------|----------|-----------|--------|---------|--------|------|---------------------|--------|--------|
| 322.1345  | 1 | C <sub>22</sub> H <sub>16</sub> N <sub>3</sub> | 322.1339 | -1.9      | 13.6   | 2       | 100.00 | 16.5 | even                | ok     | M+H    |

### Acquisition Parameter

|             |          |                      |          |                  |           |
|-------------|----------|----------------------|----------|------------------|-----------|
| Source Type | ESI      | Ion Polarity         | Positive | Set Nebulizer    | 1.0 Bar   |
| Focus       | Active   | Set Capillary        | 4500 V   | Set Dry Heater   | 200 °C    |
| Scan Begin  | 50 m/z   | Set End Plate Offset | -500 V   | Set Dry Gas      | 6.0 l/min |
| Scan End    | 1500 m/z | Set Charging Voltage | 2000 V   | Set Divert Valve | Waste     |
|             |          | Set Corona           | 0 nA     | Set APCI Heater  | 0 °C      |

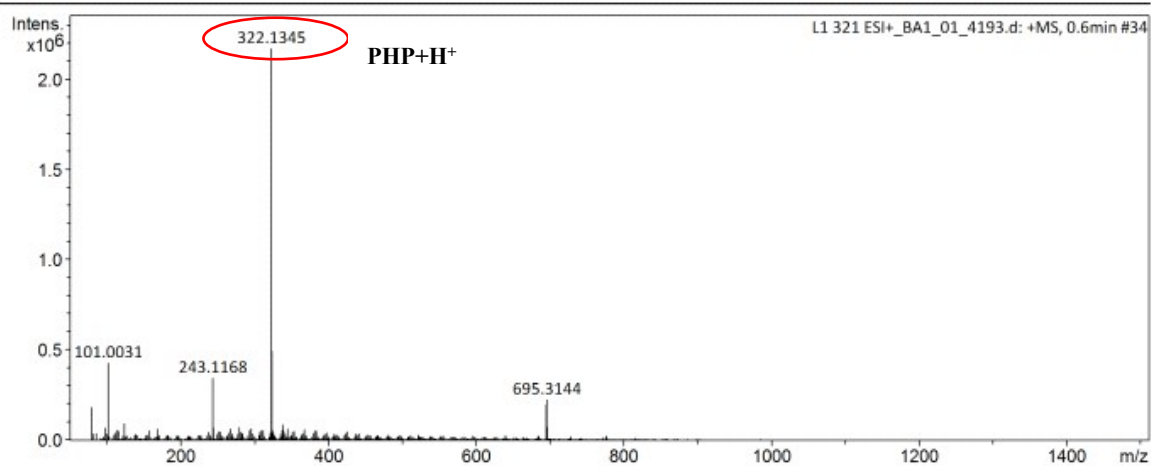

**Figure S3.** HR Mass (ESI) spectrum of PHP

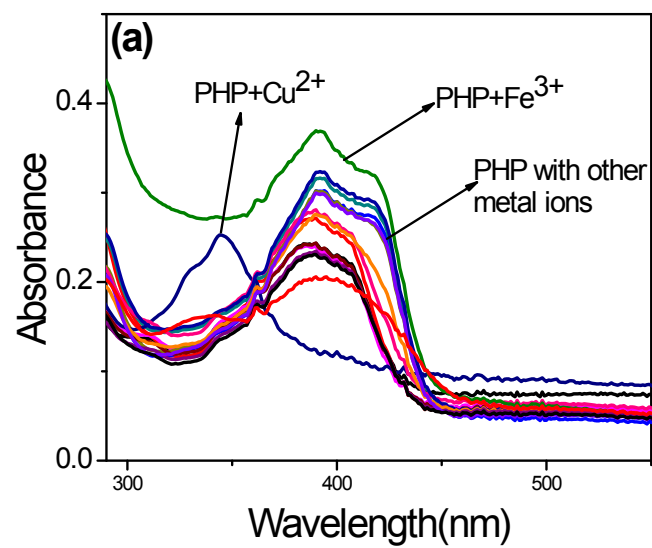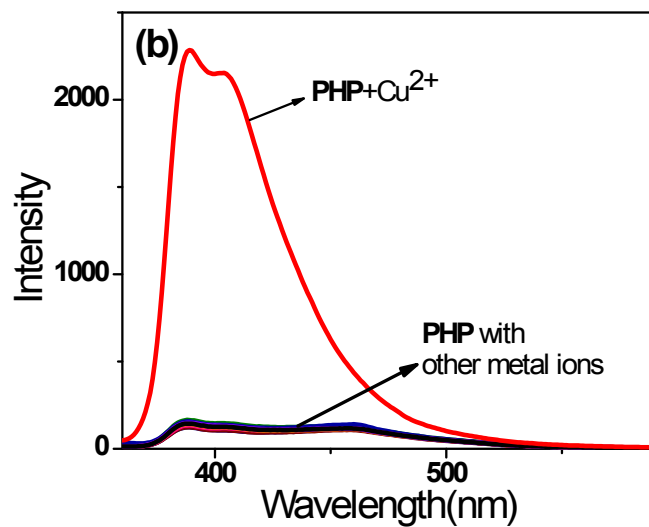

**Figure S4.** Absorbance changes (a) and Fluorescence response (b) of PHP (10  $\mu\text{M}$ ) to different metal ions (50  $\mu\text{M}$ ) in  $\text{CH}_3\text{CN}/\text{H}_2\text{O}$  (v/v = 4:6, 10 mM PBS, pH 7.4) solution. The excitation wavelength was 346 nm.

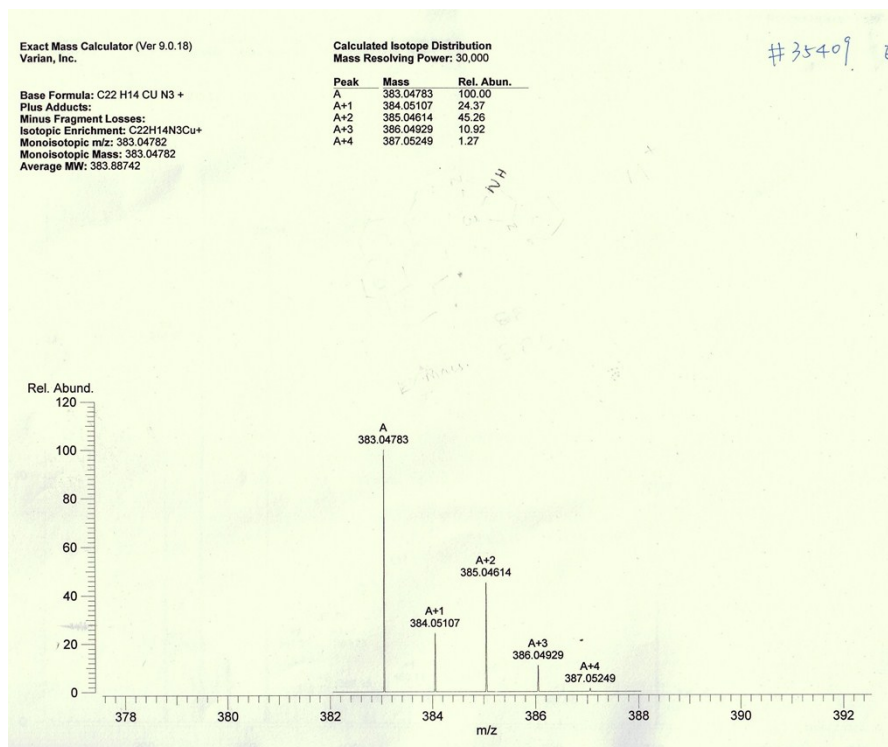

Figure S5. Mass spectrum of PHP-Cu<sup>2+</sup> complex

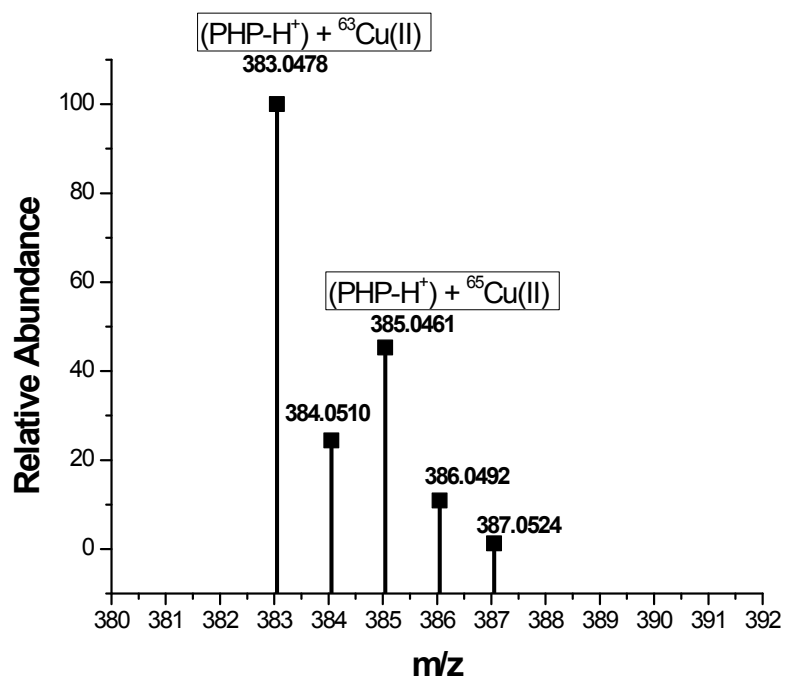

Figure S6. Calculated mass spectrum of PHP-Cu<sup>2+</sup> complex

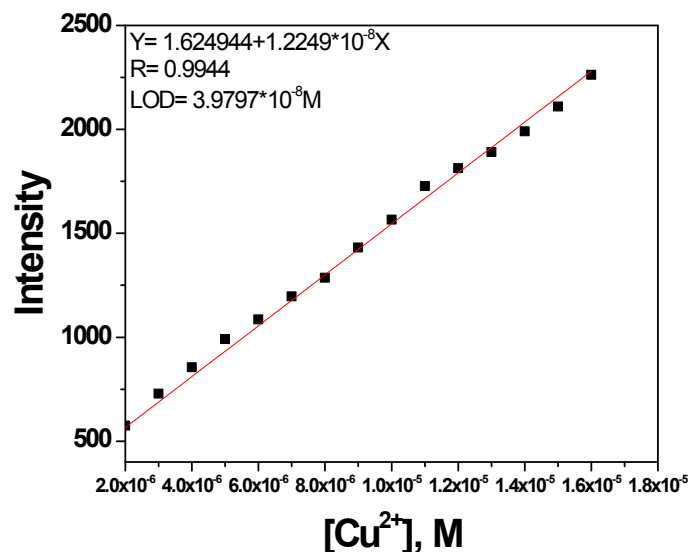

**Figure S7** Detection limit for titration of  $\text{Cu}^{2+}$  (0.2~1.5 equiv) against ratio of fluorescence response for PHP (10  $\mu\text{M}$ ) in acetonitrile-PBS buffer (0.01M, pH-7.4) (v/v = 4:6). The excitation wavelength was 346 nm and observed wavelength was 389 nm. The limit of detection was 0.04  $\mu\text{M}$  of PHP for binding  $\text{Cu}^{2+}$  based on  $3 \times \delta_{\text{blank}}/k$  (where  $\delta_{\text{blank}}$  is the standard deviation of the blank solution and  $k$  is the slope of calibration plot).  $\text{LOD} = 3 * \text{SD}/\text{Slope} = 3 * 1.624944 / 1.2249 * 10^{-8} = 4.0 * 10^{-8} \text{M}$

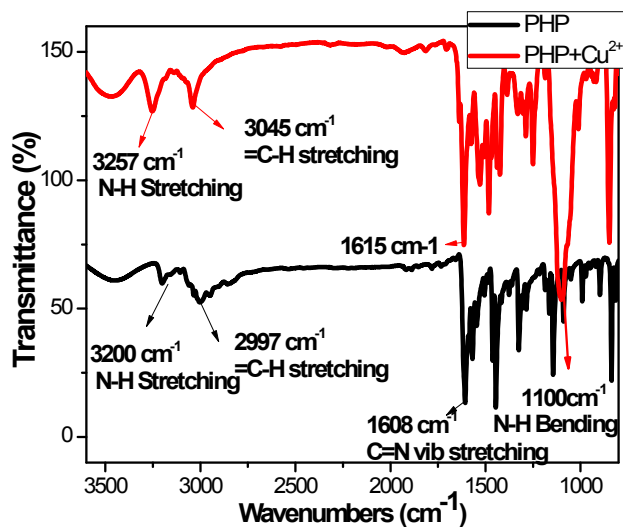

**Figure S8** IR Spectra of PHP and PHP- $\text{Cu}^{2+}$  Complex

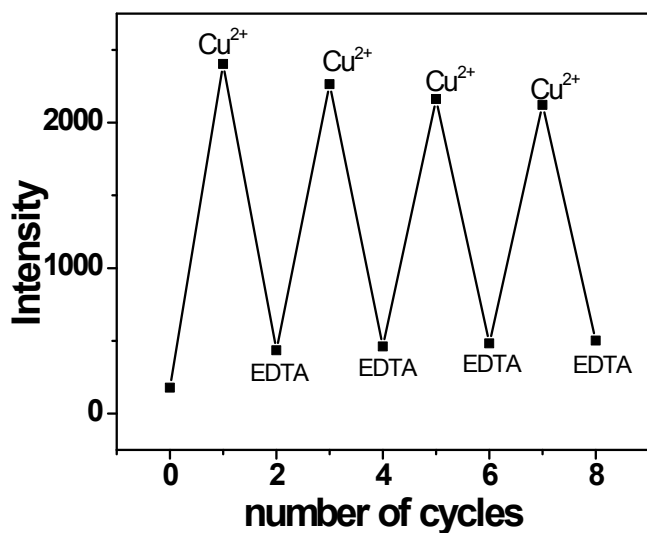

**Figure S9.** Reversible cycles of PHP-Cu<sup>2+</sup> with EDTA.

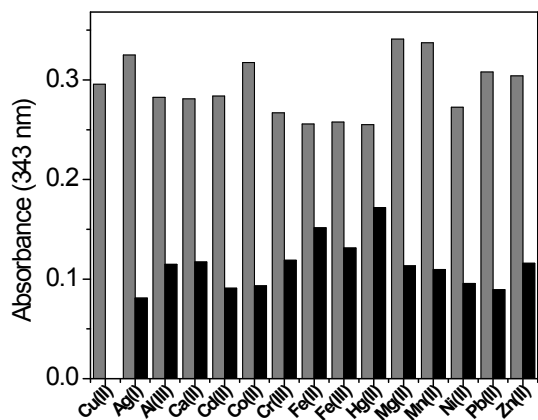

**Figure S10.** Fluorescence response of PHP (10 µM) to Cu<sup>2+</sup> (10 µM) or 50 µM of other metal ions (the black bar portion) and to the mixture of other metal ions (15 µM) with Cu<sup>2+</sup> (15 µM) (the gray bar portion) in acetonitrile-water (v/v = 3:7) solutions.
